# Supplementary material for: Development of a novel cellulose foam augmented with candle-soot derived carbon nanoparticles for solar-powered desalination of brackish water
Source: Royal Society of Chemistry journal article supplement (doi:10.1039/d1en01112j), 2022-01-01
Supplement: d1en01112j2.pdf [file d1en01112j2.pdf]

## Supporting Information

### Development of a novel cellulose-foam augmented with candle-soot derived carbon nanoparticles for solar-powered desalination of brackish water

**Amrit Kumar Thakur<sup>a\*</sup>, Ravishankar Sathyamurthy<sup>a\*</sup>, R. Velraj<sup>b</sup>, I. Lynch<sup>c\*</sup>**

<sup>a</sup> Department of Mechanical Engineering, KPR Institute of Engineering and Technology, Arasur,  
Coimbatore-641407, Tamil Nadu, India

<sup>b</sup> Institute for Energy Studies, Anna University, Chennai-600025, Tamil Nadu, India

<sup>c</sup> School of Geography, Earth and Environmental Sciences, University of Birmingham,  
Edgbaston, B15 2TT Birmingham, UK

#### \*Corresponding Authors

**Amrit Kumar Thakur<sup>a</sup> and Ravishankar Sathyamurthy<sup>a</sup>**

<sup>a</sup>Department of Mechanical Engineering, KPR Institute of Engineering and Technology, Arasur,  
Coimbatore-641407, Tamil Nadu, India

[amritt1@gmail.com](mailto:amritt1@gmail.com) (A.K.T), [raviannauniv23@gmail.com](mailto:raviannauniv23@gmail.com) (R.S)

**I. Lynch<sup>c</sup>**

<sup>c</sup>School of Geography, Earth and Environmental Sciences, University of Birmingham,  
Edgbaston, B15 2TT Birmingham, UK. [i.lynch@bham.ac.uk](mailto:i.lynch@bham.ac.uk)

**Table S1. Variation of solar radiation, ambient temperature, water temperature and water productivity in July 2021**

| <b>Date</b> | <b>Avg. Solar radiation (W/m<sup>2</sup>)</b> | <b>Avg. ambient temperature (°C)</b> | <b>Conventional TSS</b> |                                                        | <b>TSS with CF</b>     |                                                        | <b>TSS with CF-CSCNP</b> |                                                        |
|-------------|-----------------------------------------------|--------------------------------------|-------------------------|--------------------------------------------------------|------------------------|--------------------------------------------------------|--------------------------|--------------------------------------------------------|
|             |                                               |                                      | <b>Avg. water (°C)</b>  | <b>Avg. Full day water yield (L/m<sup>2</sup>.day)</b> | <b>Avg. water (°C)</b> | <b>Avg. Full day water yield (L/m<sup>2</sup>.day)</b> | <b>Avg. water (°C)</b>   | <b>Avg. Full day water yield (L/m<sup>2</sup>.day)</b> |
| 01.07.2021  | 598                                           | 33.88                                | 45.44                   | 2.32                                                   | 47.07                  | 3.15                                                   | 49                       | 6.27                                                   |
| 02.07.2021  | 578                                           | 33.82                                | 46.43                   | 2.39                                                   | 47.48                  | 3.31                                                   | 49.45                    | 6.4                                                    |
| 04.07.2021  | 560                                           | 33.0                                 | 45.1                    | 2.17                                                   | 46.7                   | 3.01                                                   | 48.3                     | 5.8                                                    |
| 07.07.2021  | 572                                           | 33.3                                 | 45.31                   | 2.27                                                   | 46.98                  | 3.1                                                    | 48.75                    | 6.1                                                    |
| 08.07.2021  | 541                                           | 32.4                                 | 44.5                    | 2                                                      | 46.1                   | 2.77                                                   | 47.90                    | 5.39                                                   |
| 13.07.2021  | 554                                           | 32.6                                 | 44.7                    | 2.09                                                   | 46.5                   | 2.92                                                   | 48                       | 5.61                                                   |
| 20.07.2021  | 550                                           | 32.54                                | 44.67                   | 2.07                                                   | 46.42                  | 2.84                                                   | 47.93                    | 5.5                                                    |
| 24.07.2021  | 534                                           | 32.31                                | 44.3                    | 1.98                                                   | 46                     | 2.7                                                    | 47.76                    | 5.3                                                    |
| 26.07.2021  | 564                                           | 33.1                                 | 45.20                   | 2.23                                                   | 46.82                  | 3.05                                                   | 48.54                    | 6.01                                                   |
| 30.07.2021  | 549                                           | 32.51                                | 44.62                   | 2.02                                                   | 46.3                   | 2.77                                                   | 47.97                    | 5.41                                                   |

**Table S 2. Variation of droplet size with respect to solar radiation in all three TSS**

| <b>Type of TSS</b> | <b>Solar radiation</b>       | <b>Solar radiation</b>       | <b>Solar radiation</b>       | <b>Solar radiation</b>       |
|--------------------|------------------------------|------------------------------|------------------------------|------------------------------|
|                    | <b>(430 W/m<sup>2</sup>)</b> | <b>(570 W/m<sup>2</sup>)</b> | <b>(810 W/m<sup>2</sup>)</b> | <b>(830 W/m<sup>2</sup>)</b> |
|                    | <b>Droplet size</b>          | <b>Droplet size</b>          | <b>Droplet size</b>          | <b>Droplet size</b>          |
|                    | <b>range (mm)</b>            | <b>range (mm)</b>            | <b>range (mm)</b>            | <b>range (mm)</b>            |
| Conventional TSS   | 0.1-0.3                      | 0.2-1                        | 0.4-2.7                      | 1.2-4.7                      |
| TSS-CF             | 0.1-0.5                      | 0.5-1.2                      | 0.5-3.9                      | 1.8-6                        |
| TSS with CF-CSCNP  | 0.1-1                        | 0.5-1.8                      | 0.5-6                        | 3.5-9.5                      |

**Table S 3. Variation in water output with time for TSS and modified TSS**

| <b>Days of experiment</b> | <b>Full-day water yield enhancement of TSS-CF, compared to Conventional TSS (%)</b> | <b>Full-day water yield enhancement of TSS with CF-CSCNP, compared to Conventional TSS (%)</b> |
|---------------------------|-------------------------------------------------------------------------------------|------------------------------------------------------------------------------------------------|
| Start of the experiment   | 38.49                                                                               | 170.25                                                                                         |
| 30 <sup>th</sup> day      | 37.04                                                                               | 167.80                                                                                         |
| 60 <sup>th</sup> day      | 35.56                                                                               | 165.50                                                                                         |
| 90 <sup>th</sup> day      | 32.95                                                                               | 163.74                                                                                         |
| 120 <sup>th</sup> day     | 30.78                                                                               | 161                                                                                            |
| 150 <sup>th</sup> day     | 27.85                                                                               | 158.95                                                                                         |
| 180 <sup>th</sup> day     | 25.78                                                                               | 155.13                                                                                         |

## Water Quality Standard

- **Desirable, acceptable, or tolerable limits:** It refer to the maximum amount of a specific salt or element that can be present in water. Water with that particular element in excess of that level is unfit to drink. This limit needs to be implemented.
- **Permissible limit:** On the other hand, the permissible limit for that element is the maximum amount of water that can be consumed if no other source of water is available.

Therefore, we should routinely drink water with total hardness below 200 ppm, which is the desirable and acceptable limit for water. However, we may consume water of up to 600 ppm total hardness if there is no alternate source of water available.
